# Supplementary material for: Open-source Arduino-derived data loggers designed for field research
Source: Copernicus journal article supplement (doi:10.5194/hess-2018-591), 2018-12-07

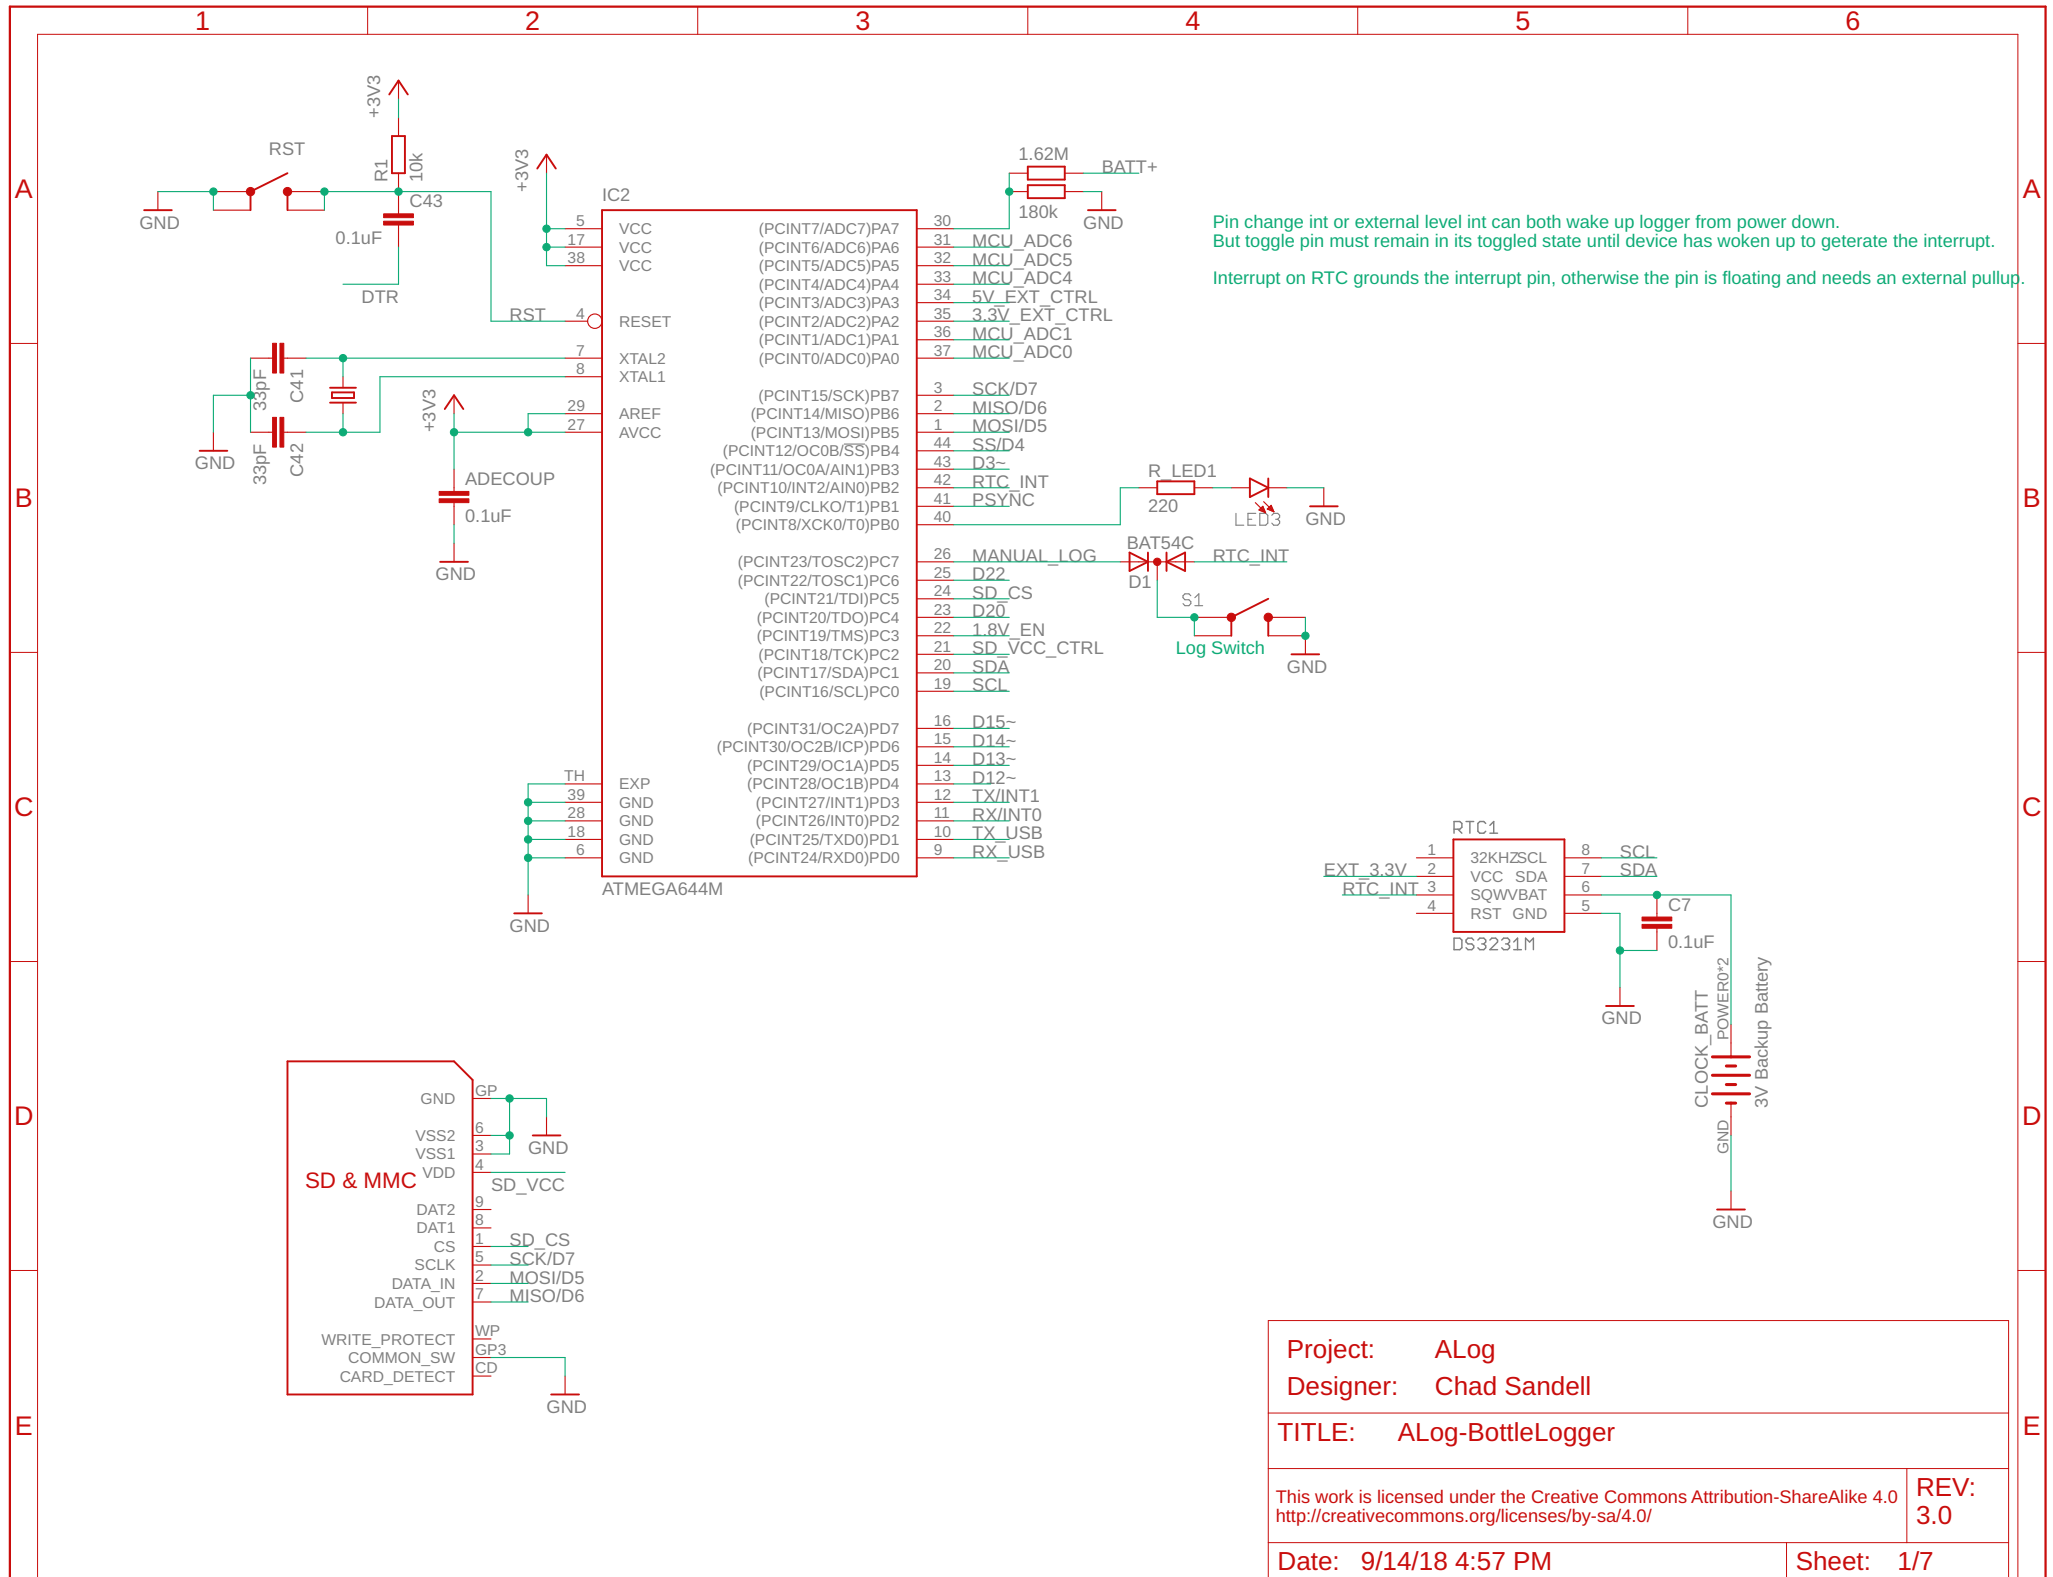

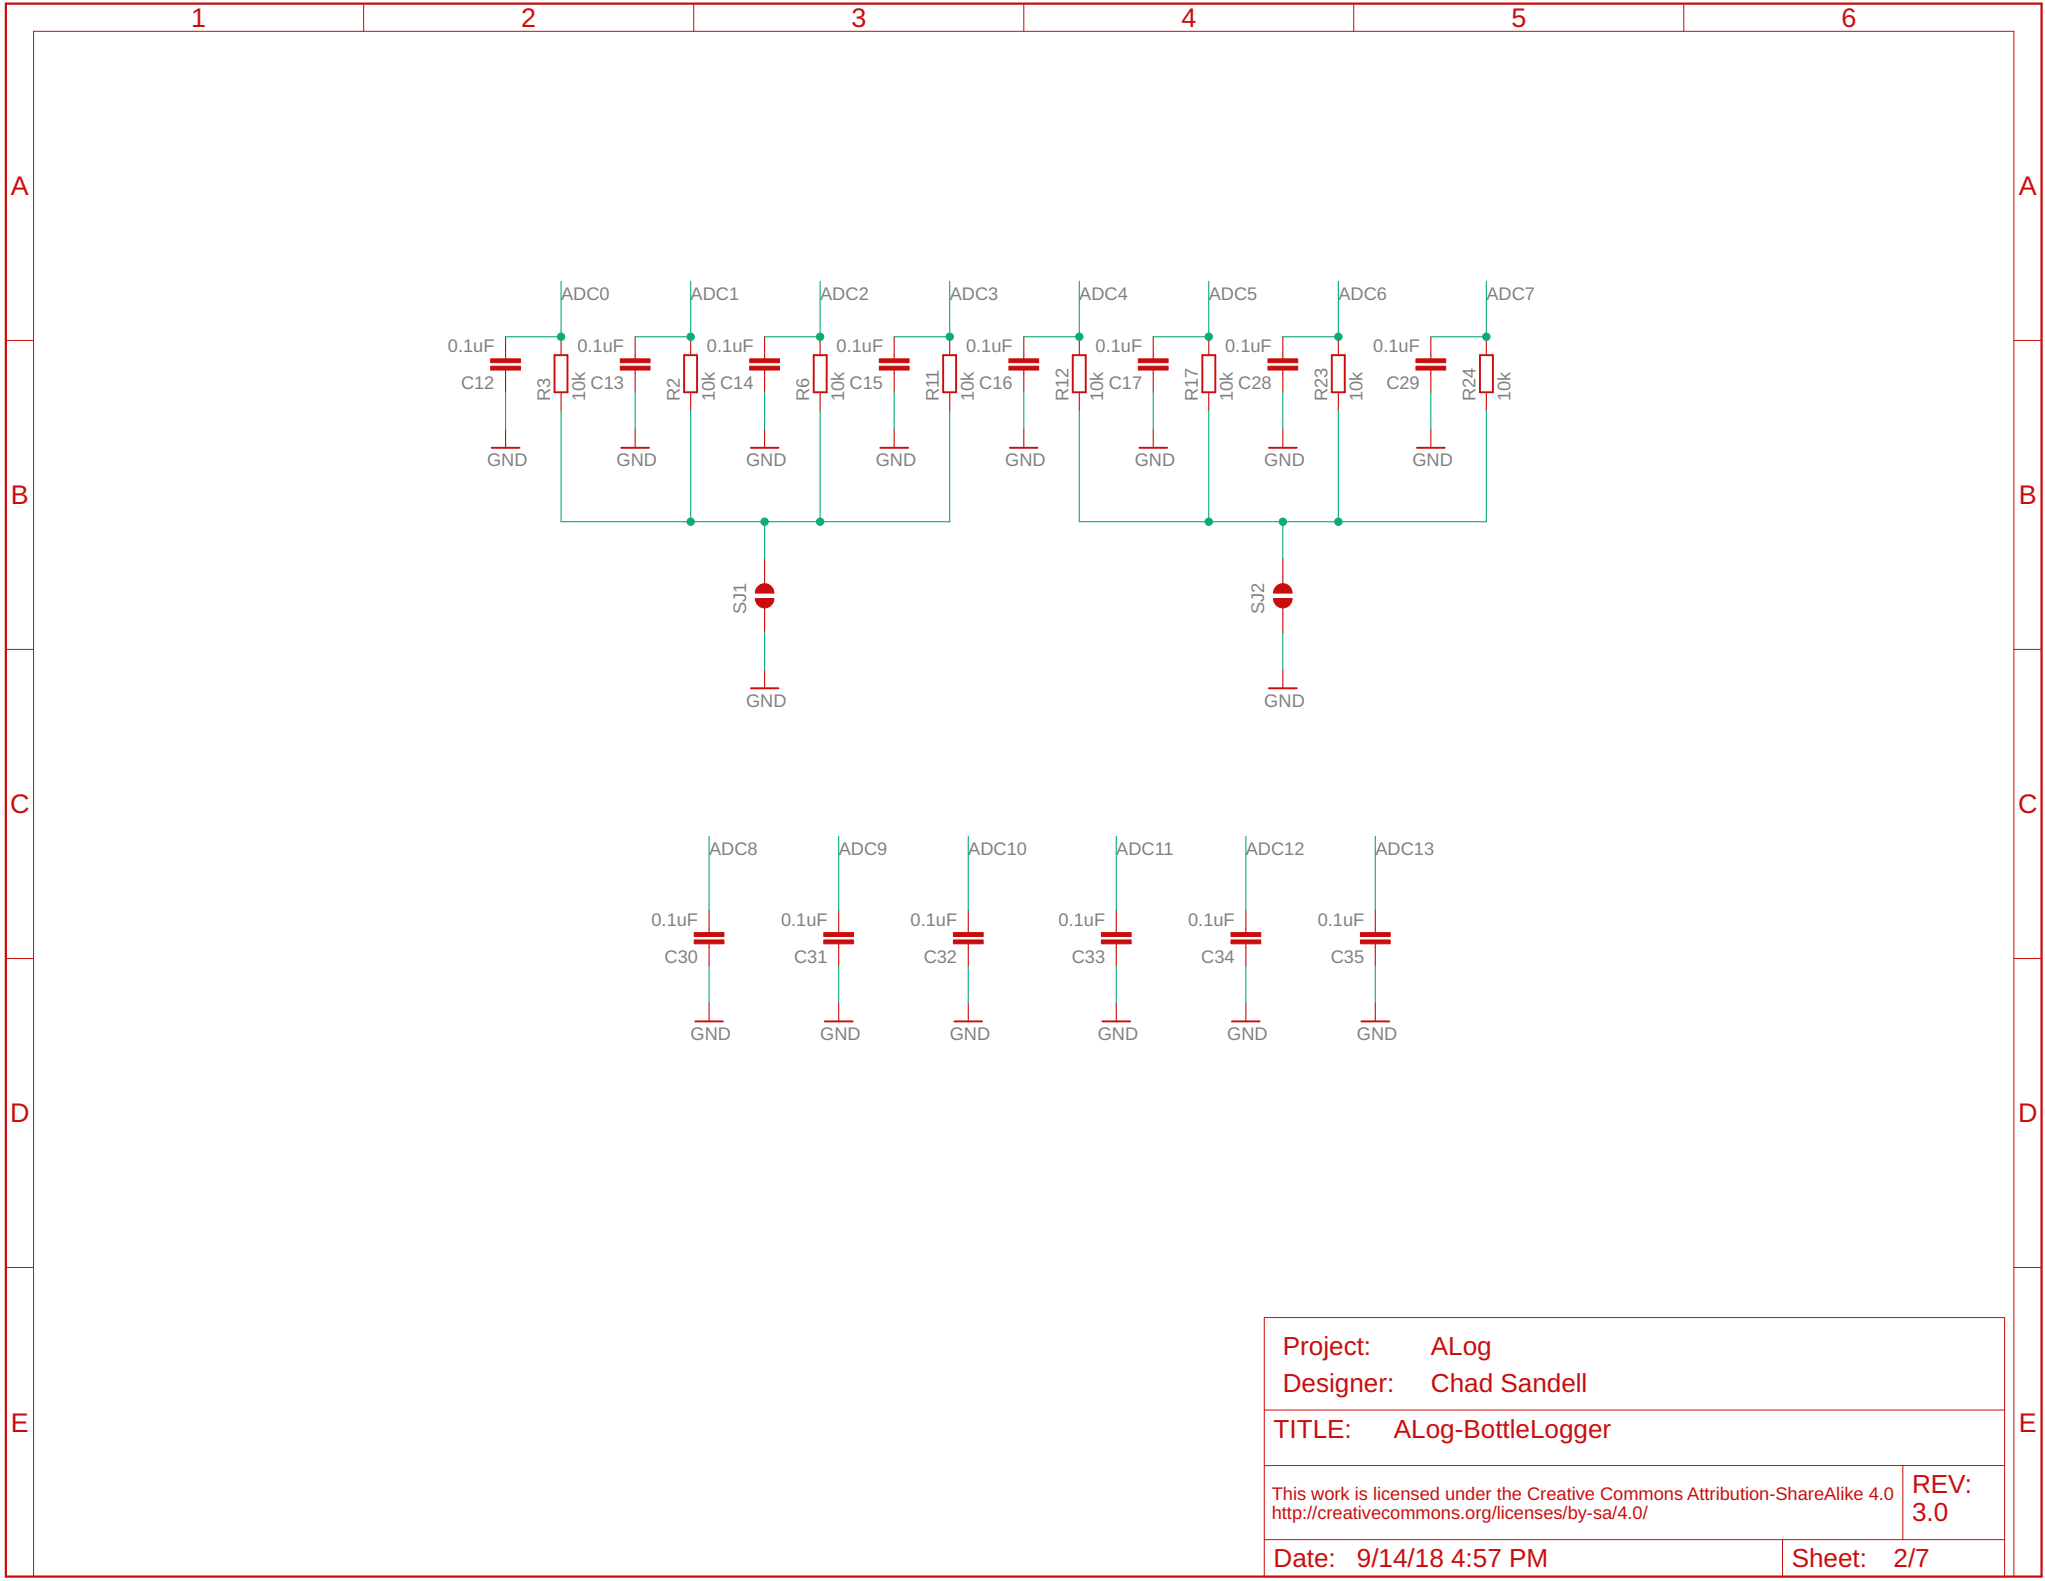

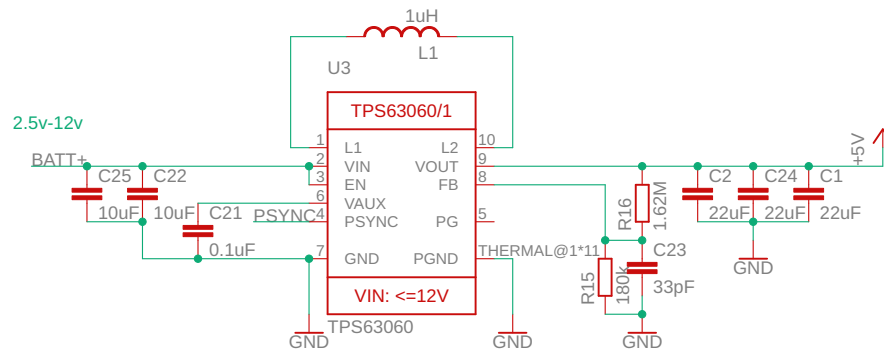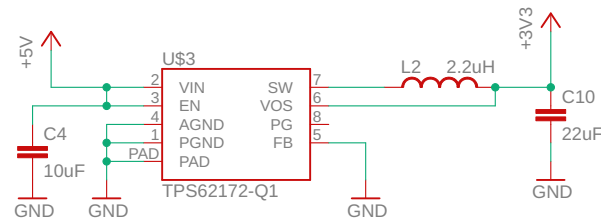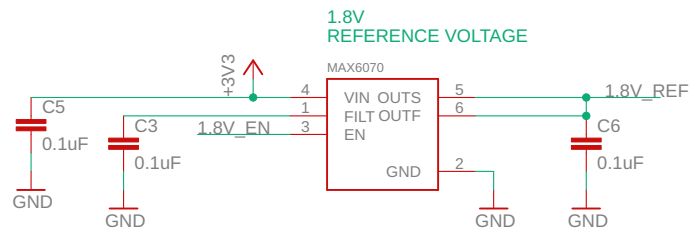

Project: ALog

Designer: Chad Sandell

TITLE: ALog-BottleLogger

This work is licensed under the Creative Commons Attribution-ShareAlike 4.0  
<http://creativecommons.org/licenses/by-sa/4.0/>

REV:  
3.0

Date: 9/14/18 4:57 PM

Sheet: 3/7

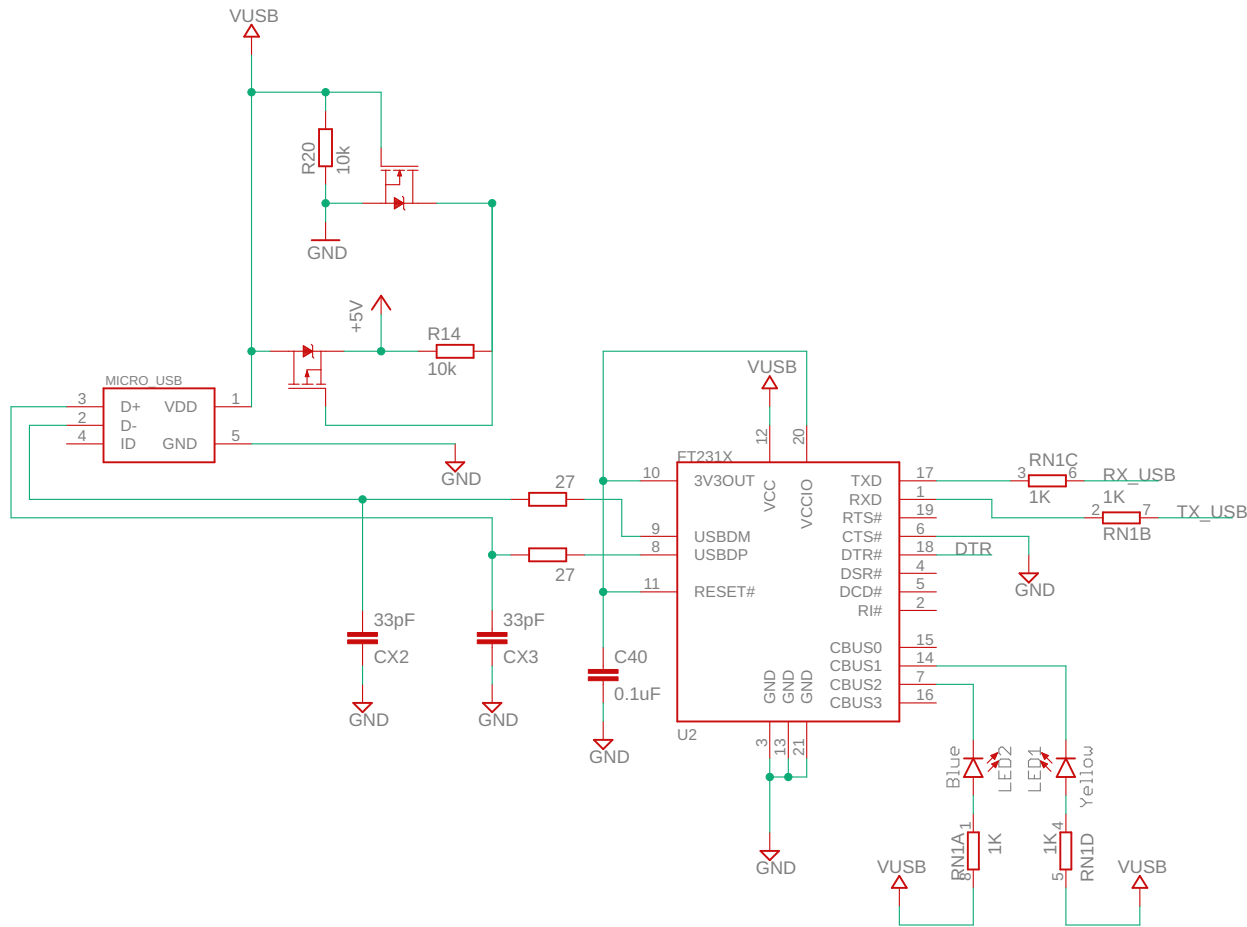

|                                                                                                                                                                                            |             |
|--------------------------------------------------------------------------------------------------------------------------------------------------------------------------------------------|-------------|
| Project: ALog                                                                                                                                                                              |             |
| Designer: Chad Sandell                                                                                                                                                                     |             |
| TITLE: ALog-BottleLogger                                                                                                                                                                   |             |
| This work is licensed under the Creative Commons Attribution-ShareAlike 4.0<br><a href="http://creativecommons.org/licenses/by-sa/4.0/">http://creativecommons.org/licenses/by-sa/4.0/</a> | REV:<br>3.0 |
| Date: 9/14/18 4:57 PM                                                                                                                                                                      | Sheet: 4/7  |

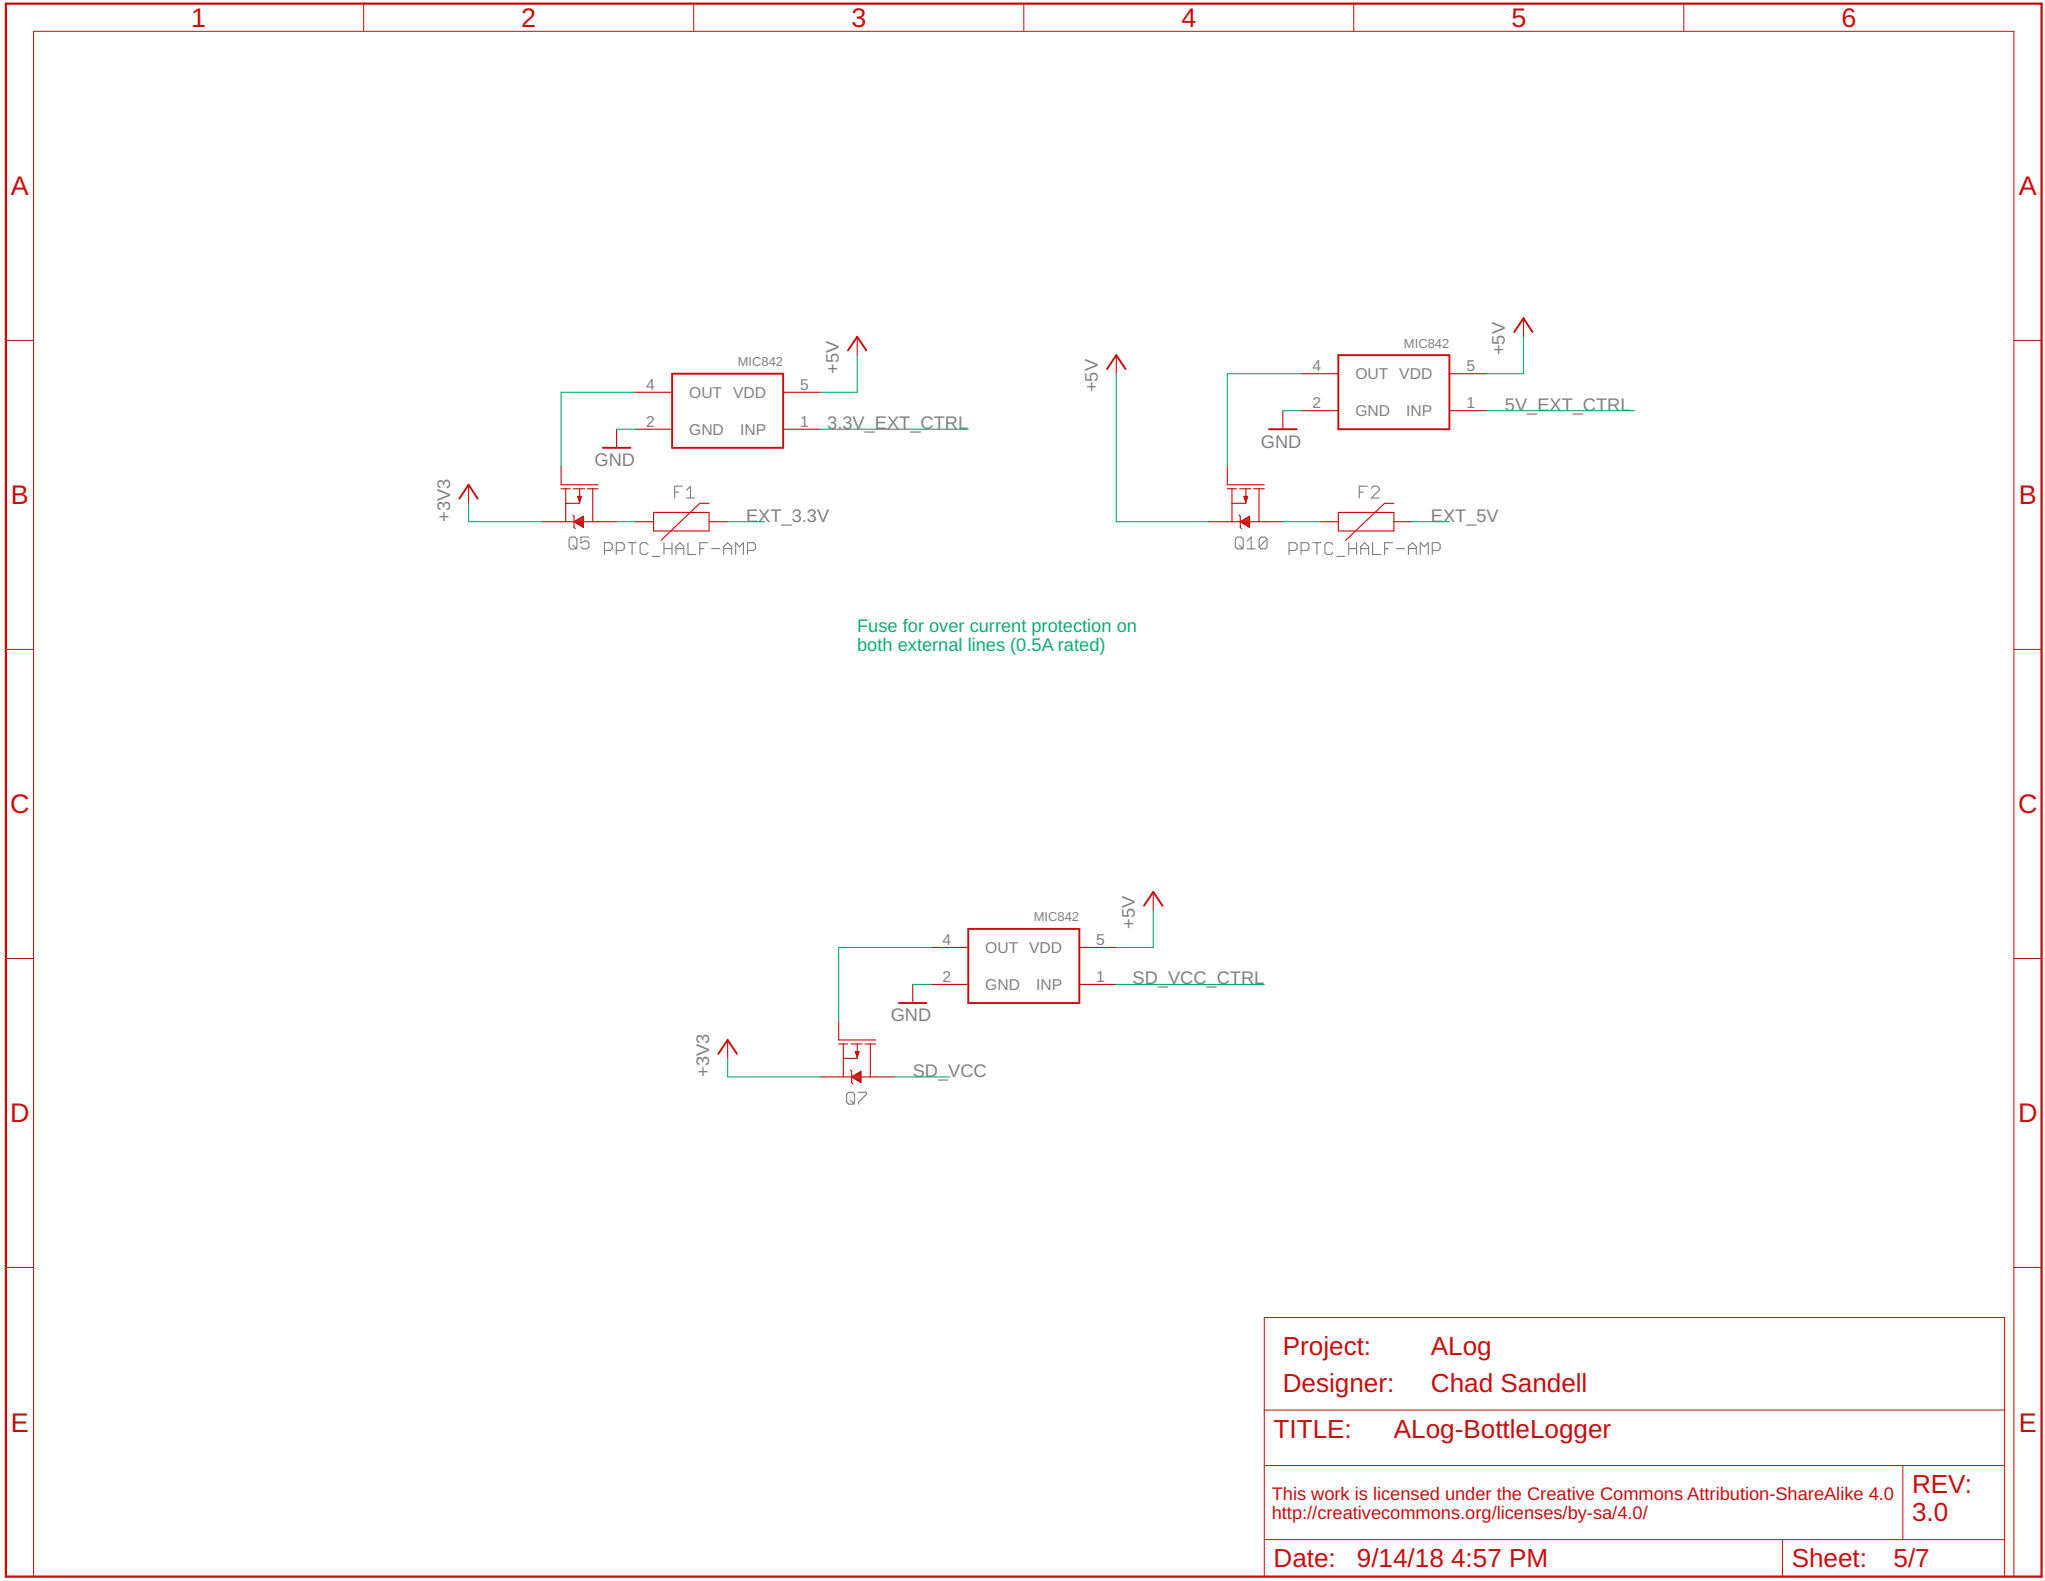

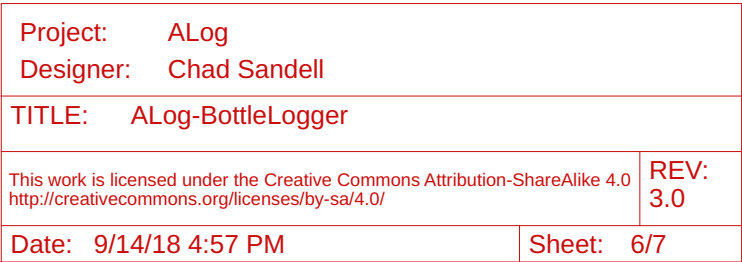

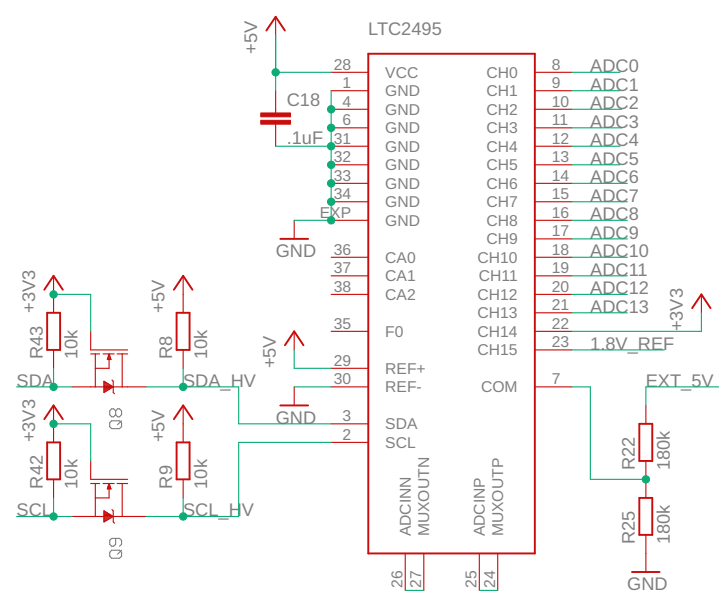

Supplement: Supplementary file 3 [file hess-2018-591-supplement.zip]
