# Supplementary material for: Open-source Arduino-derived data loggers designed for field research
Source: Copernicus journal article supplement (doi:10.5194/hess-2018-591), 2018-12-07
Supplement: Supplementary file 1 [file hess-2018-591-supplement.zip]

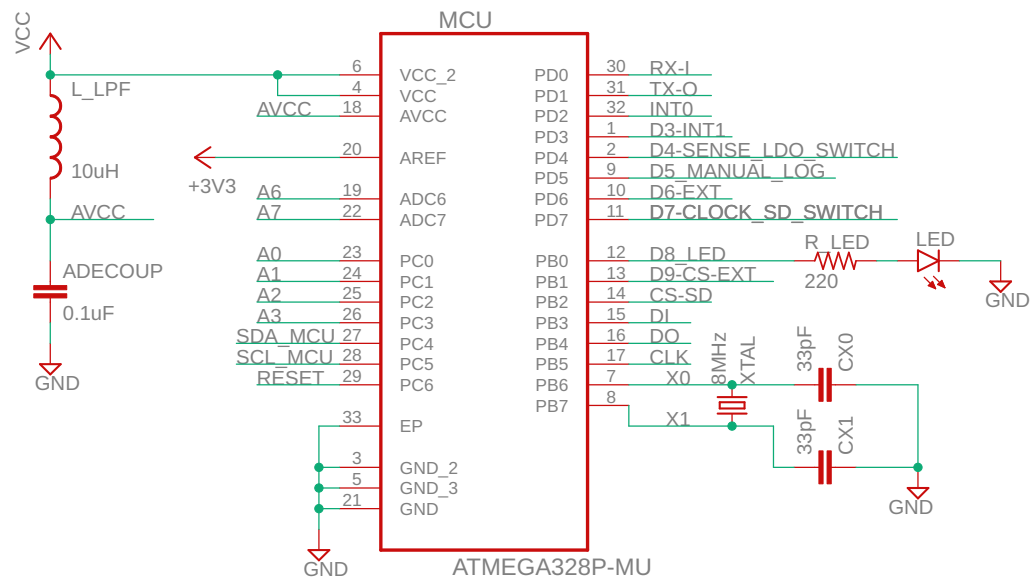

## USER IO &amp; REFERENCE RESISTORS

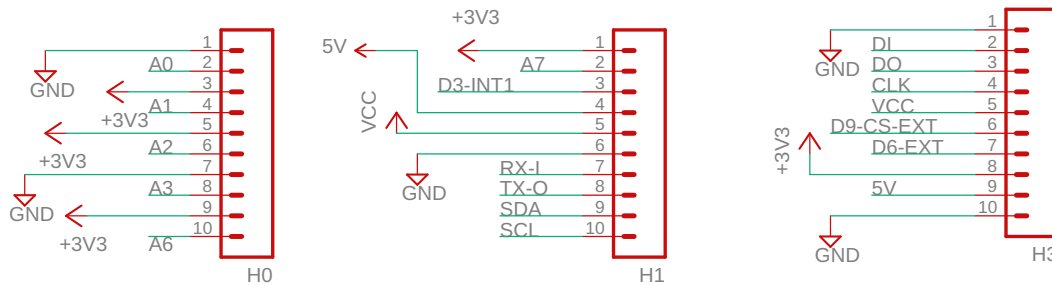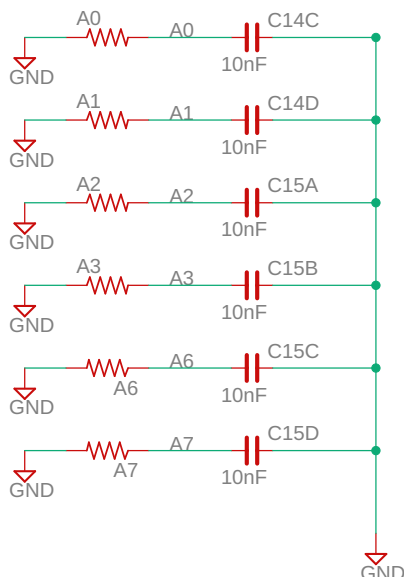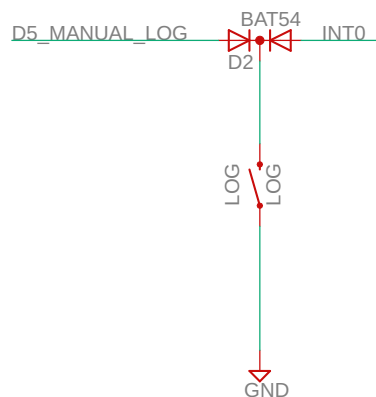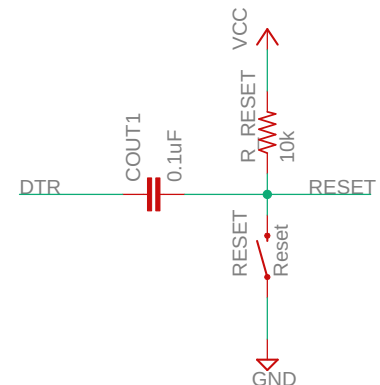

ALOG

Andrew Wickert  
Chad Sandell

TITLE: ALog-BottleLogger

Document Number:

REV:

2.2.0

Date: 6/6/17 9:11 AM

Sheet: 1/4

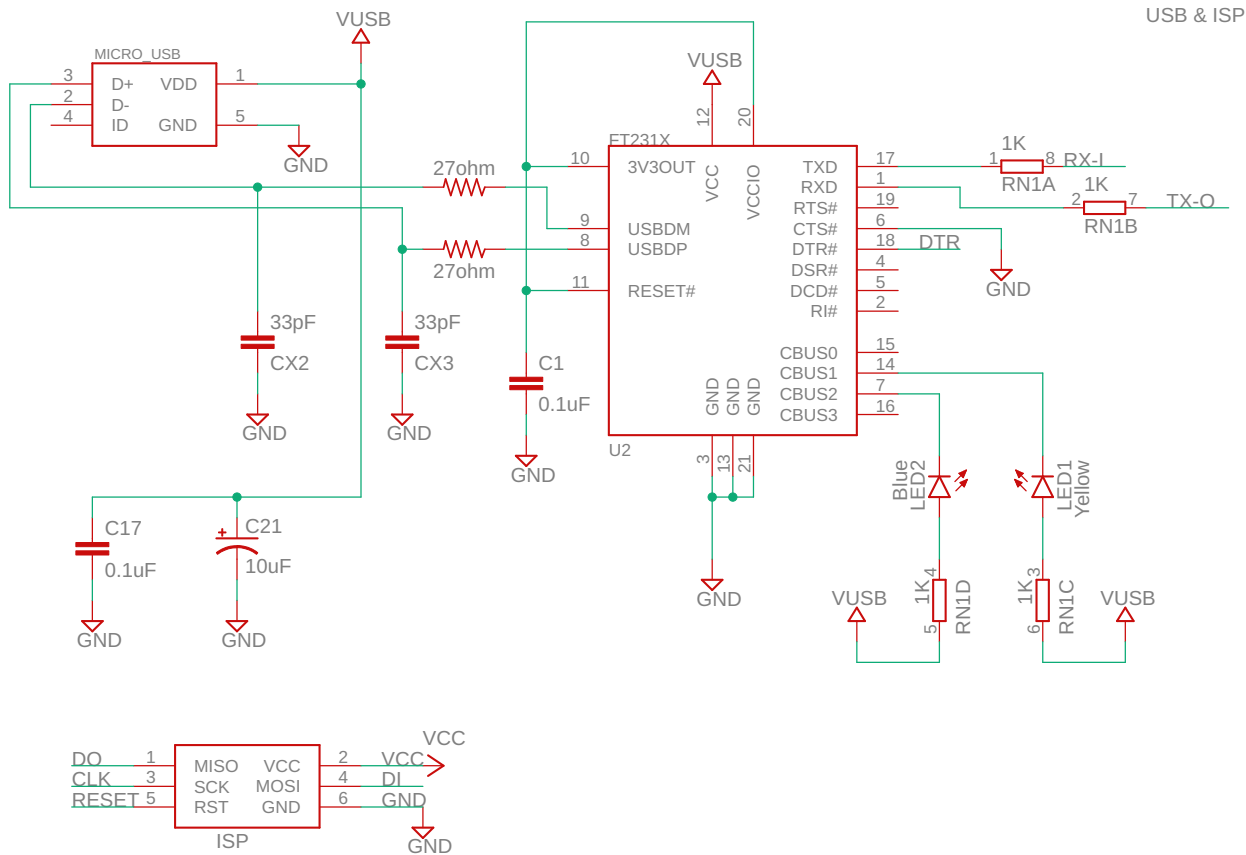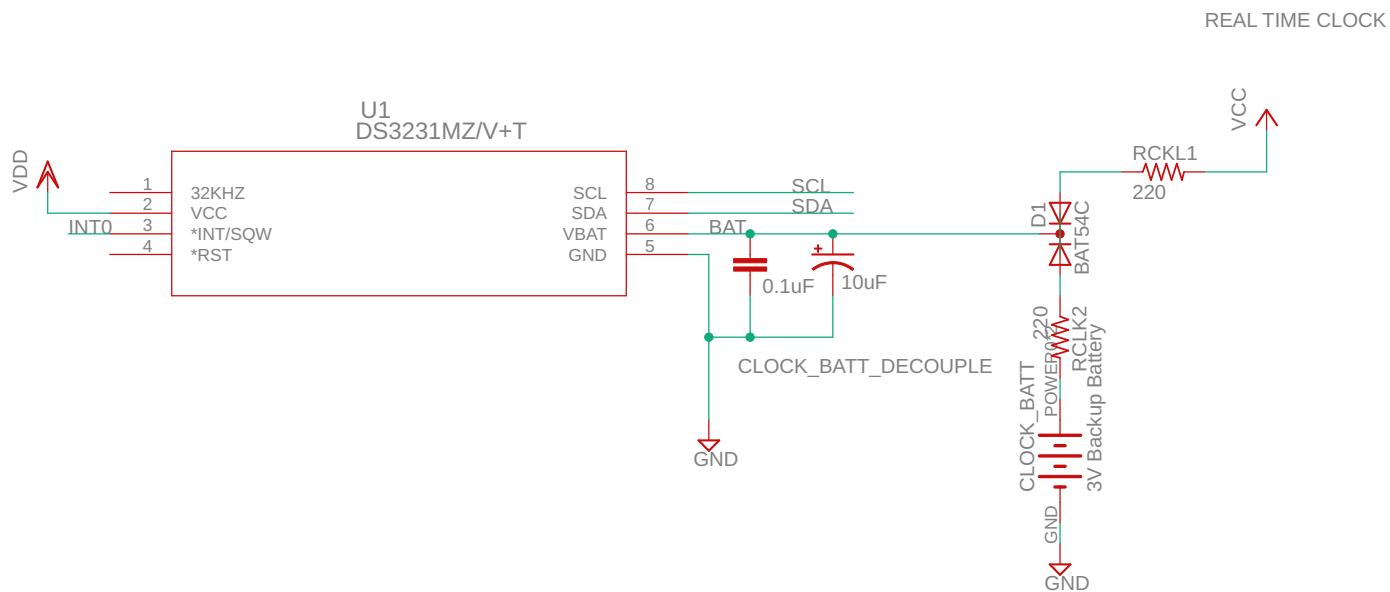

# A LOG

Andrew Wickert  
Chad Sandell

TITLE: ALog-BottleLogger

Document Number:

REV:  
2.2.0

Date: 6/6/17 9:11 AM

Sheet: 2/4

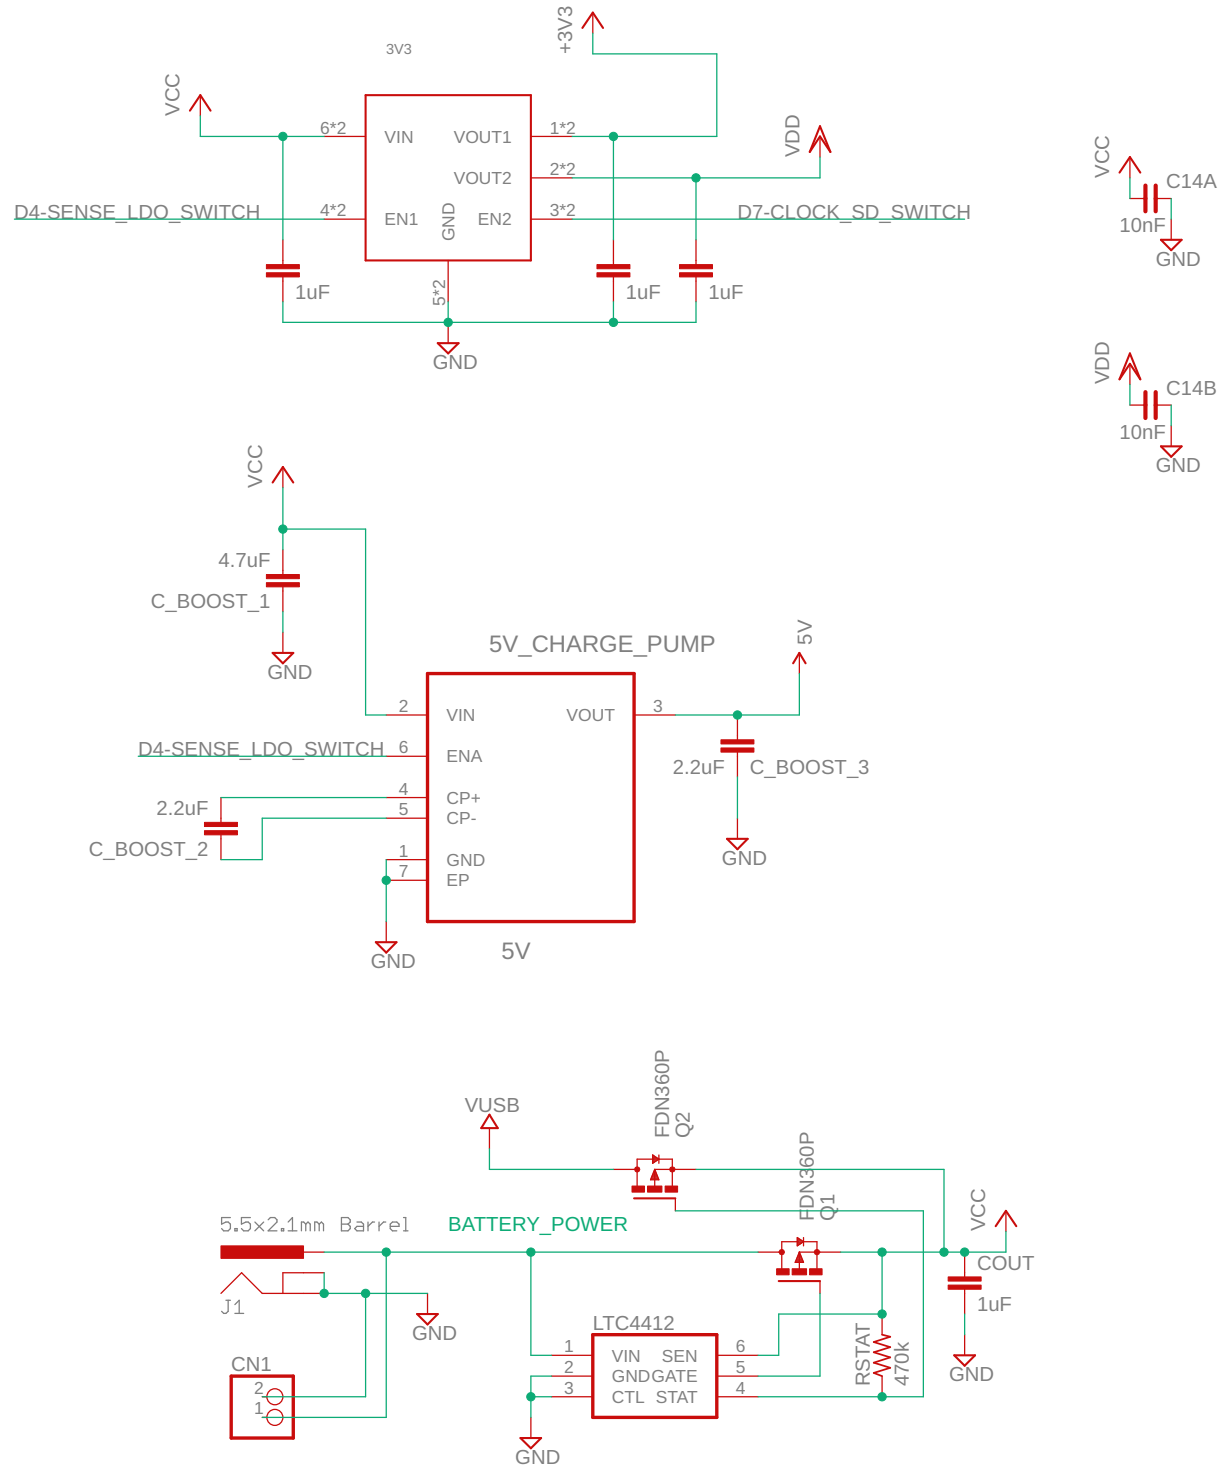

ALOG

Andrew Wickert  
Chad Sandell

TITLE: ALog-BottleLogger

Document Number:

REV:  
2.2.0

Date: 6/6/17 9:11 AM

Sheet: 3/4

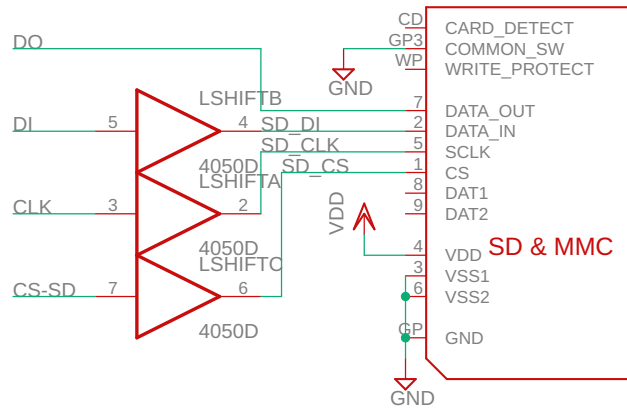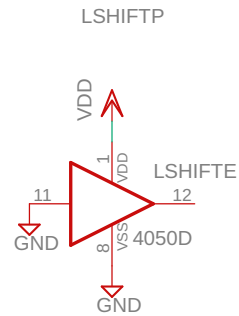

SD CARD AND LEVEL SHIFTER

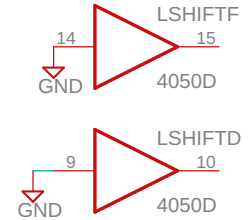

I2C BIDIRECTIONAL LEVEL SHIFTER

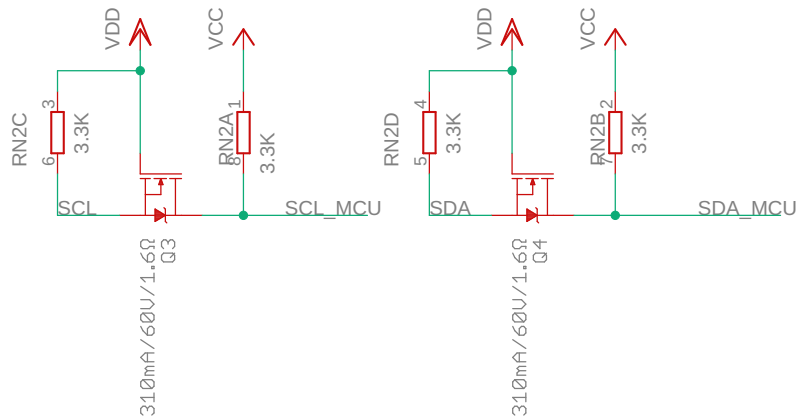

Released under the Creative Commons Attribution Share-Alike 3.0 License  
<http://creativecommons.org/licenses/by-sa/3.0>  
 Design by: Andrew D. Wickert and Chad T. Sandell

ALog data logger  
 by:  
 Andrew Wickert (2011-)  
 and  
 Chad Sandell (2016-)

Northern Widget LLC  
 and  
 University of Minnesota

Northern Widget ALog back silk

Northern Widget Logo  
 Northern Widget Logo  
 2.2.0

○ ○ ○ ○ ○  
 ALog Logo on Board

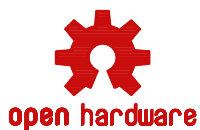

ALOG

Andrew Wickert  
 Chad Sandell

TITLE: ALog-BottleLogger

Document Number:

REV:  
 2.2.0

Date: 6/6/17 9:11 AM

Sheet: 4/4
