# Supplementary material for: Open-source Arduino-derived data loggers designed for field research
Source: Copernicus journal article supplement (doi:10.5194/hess-2018-591), 2018-12-07
Supplement: Supplementary file 4 [file hess-2018-591-supplement.zip]

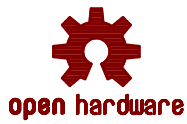

Northern Widget Logo

MICROCONTROLLER, SHIELD LAYOUT,  
& INDICATOR LED

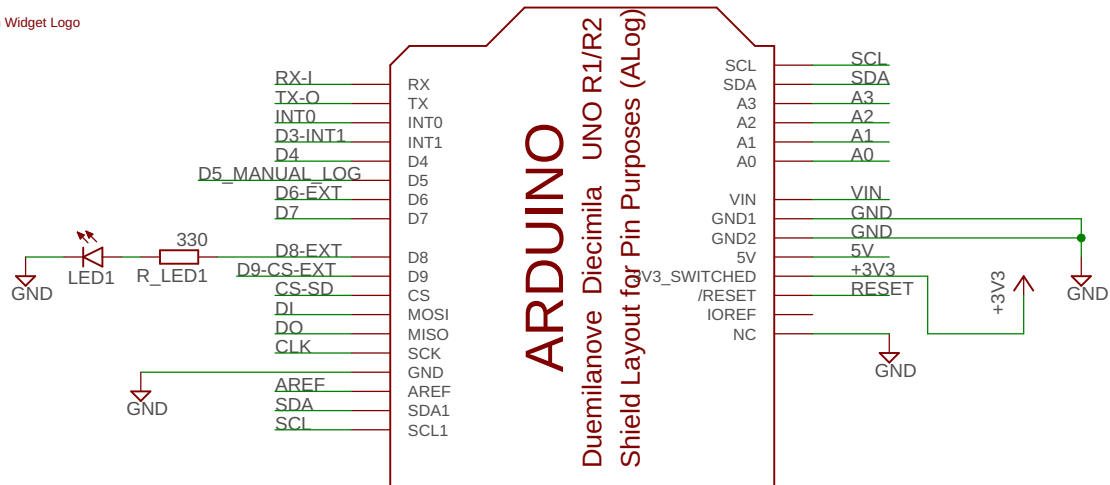

USER IO & REFERENCE RESISTORS

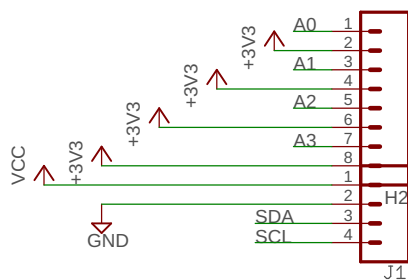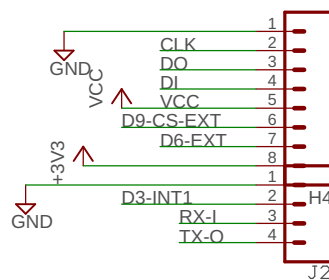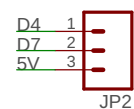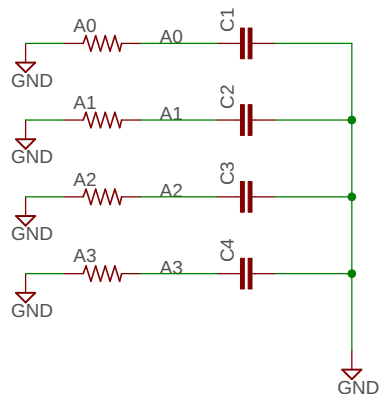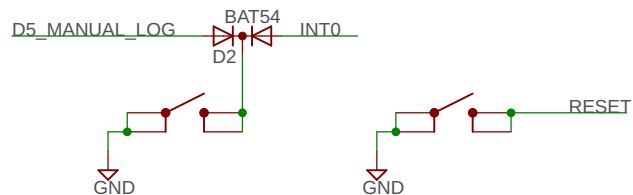

Made in Minnesota  
ALog Logo on Board

ALOG

Andrew Wickert  
Chad Sandell

TITLE: ALog-Shield

Document Number:

REV:  
2.2.0

Date: 9/15/18 9:43 AM

Sheet: 1/2

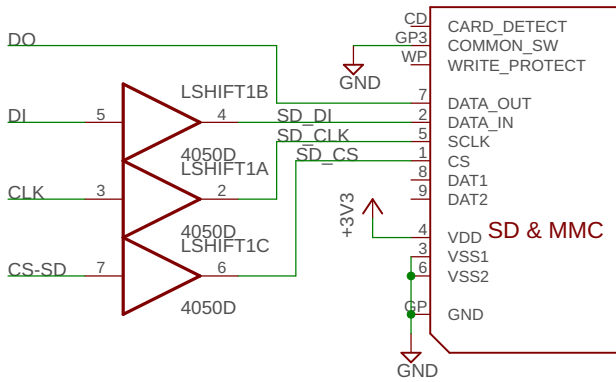

LSHIFT1P

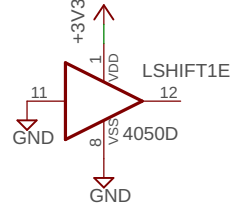

SD CARD AND LEVEL SHIFTER

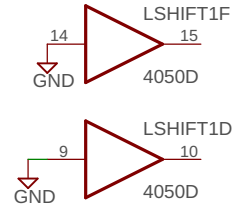

POWER: SIMPLY USE ARDUINO 3V3

REAL TIME CLOCK

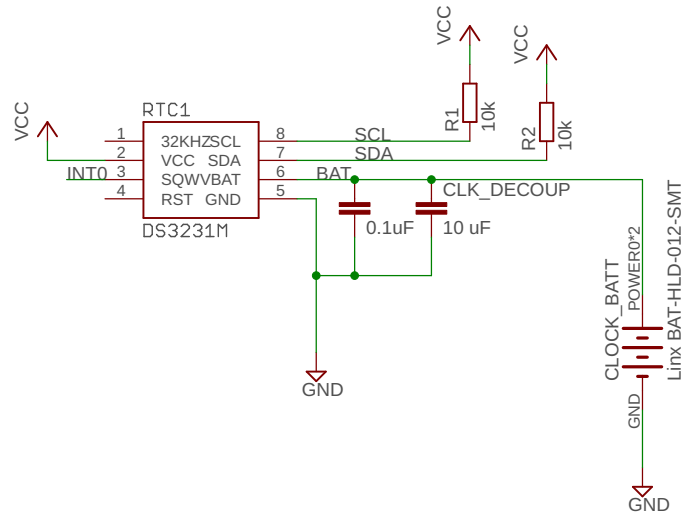

Released under the Creative Commons Attribution Share-Alike 3.0 License  
<http://creativecommons.org/licenses/by-sa/3.0>  
 Design by: Andrew D. Wickert and Chad T. Sandell  
 with assistance from Bobby Schulz

JUMPER: REFERENCE ANALOG TO 3V3 INSTEAD OF VCC

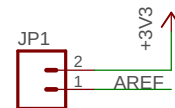

ALOG

Andrew Wickert  
 Chad Sandell

TITLE: ALog-Shield

Document Number:

REV:

2.2.0

Date: 9/15/18 9:43 AM

Sheet: 2/2
